# Supplementary material
Source: PubMed Central journal article supplement (PMC3659331)
Supplement: NIHMS450702-supplement-01.pdf [file NIHMS450702-supplement-01.pdf]

# Sexual Orientation Disparities in Cardiovascular Biomarkers Among Young Adults

Mark L. Hatzenbuehler, PhD, Kate A. McLaughlin, PhD, Natalie Slopen, ScD

## Appendix A

Results of linear regression analyses for log C-reactive protein (CRP)<sup>a</sup> by gender<sup>b</sup>

|                                                      | Men   |      |         | Women |      |         |
|------------------------------------------------------|-------|------|---------|-------|------|---------|
|                                                      | Beta  | SE   | p-value | Beta  | SE   | p-value |
| <b>Gay/bisexual</b>                                  | 0.21  | 0.09 | 0.02    | -0.18 | 0.09 | 0.04    |
| <b>Age (years)</b>                                   | 0.02  | 0.01 | 0.03    | 0.00  | 0.01 | 0.69    |
| <b>Race</b>                                          |       |      |         |       |      |         |
| Black                                                | 0.04  | 0.06 | 0.48    | -0.15 | 0.06 | 0.01    |
| Asian                                                | -0.09 | 0.08 | 0.29    | -0.34 | 0.10 | 0.00    |
| Hispanic                                             | 0.07  | 0.06 | 0.21    | 0.09  | 0.06 | 0.13    |
| Multiracial, Native American, other                  | -0.07 | 0.08 | 0.38    | -0.11 | 0.08 | 0.16    |
| White                                                | ref   |      |         | ref   |      |         |
| <b>Education</b>                                     |       |      |         |       |      |         |
| <High school                                         | 0.19  | 0.10 | 0.07    | 0.02  | 0.12 | 0.85    |
| High school degree                                   | 0.19  | 0.09 | 0.05    | 0.00  | 0.08 | 0.98    |
| Some college/technical degree                        | 0.15  | 0.08 | 0.08    | -0.08 | 0.08 | 0.28    |
| Bachelor's degree                                    | -0.02 | 0.07 | 0.76    | -0.02 | 0.08 | 0.83    |
| Graduate degree                                      | ref   |      |         | ref   |      |         |
| <b>Household income (\$)</b>                         |       |      |         |       |      |         |
| Missing                                              | 0.15  | 0.09 | 0.10    | 0.07  | 0.12 | 0.55    |
| 0-24,999                                             | 0.01  | 0.09 | 0.93    | 0.08  | 0.08 | 0.27    |
| 25,000-39,999                                        | 0.02  | 0.08 | 0.77    | 0.05  | 0.07 | 0.46    |
| 40,000-74,999                                        | -0.04 | 0.06 | 0.53    | 0.13  | 0.06 | 0.04    |
| 75,000-99,999                                        | -0.07 | 0.08 | 0.35    | 0.08  | 0.07 | 0.26    |
| ≥100,000                                             | ref   |      |         | ref   |      |         |
| <b>Smoking status (%)</b>                            |       |      |         |       |      |         |
| Current                                              | 0.23  | 0.05 | <.0001  | -0.12 | 0.05 | 0.03    |
| Past/Intermittent                                    | 0.05  | 0.04 | 0.26    | 0.00  | 0.05 | 0.92    |
| Never                                                | ref   |      |         | ref   |      |         |
| <b>Alcohol consumption</b>                           |       |      |         |       |      |         |
| Moderate drinker                                     | -0.06 | 0.05 | 0.20    | 0.09  | 0.05 | 0.05    |
| Heavy drinker                                        | 0.04  | 0.10 | 0.70    | -0.06 | 0.17 | 0.71    |
| Abstainer                                            | ref   |      |         | ref   |      |         |
| <b>Regular physical activity</b>                     | -0.08 | 0.04 | 0.04    | -0.05 | 0.05 | 0.23    |
| <b>BMI</b>                                           | 0.07  | 0.00 | <0.0001 | 0.08  | 0.00 | <0.0001 |
| <b>Cardiac medication</b>                            | -0.01 | 0.10 | 0.96    | -0.07 | 0.12 | 0.57    |
| <b>Aspirin or other anti-inflammatory medication</b> | 0.13  | 0.05 | 0.004   | 0.10  | 0.04 | 0.02    |
| <b>Illness in past 2 weeks</b>                       | 0.21  | 0.04 | <0.0001 | 0.06  | 0.04 | 0.17    |
| <b>R<sup>2</sup></b>                                 |       |      | 0.22    |       |      | 0.24    |

<sup>a</sup>The sensitivity of the CRP assay was 0.035 mg/L; the within-assay coefficient of variation was 8.1%; and between-assay coefficient of variation was 11.0%. Information obtained from Whitsel et al.<sup>1</sup>

<sup>b</sup>Linear regression analyses were conducted separately by gender. Gay/bisexual and lesbian/bisexual categories were compared to heterosexuals (i.e., the reference category). All models take into account the complex sample design, and sample weights.

## References for Appendix A

1. Whitsel EA, Cuthbertson CC, Tabor JW, et al. Measures of inflammation and immune function. Add Health Wave IV Documentation. Chapel Hill NC: Carolina Population Center, 2012.

## Appendix B

### Results of linear regression analyses for glycosylated hemoglobin (log HbA1c)<sup>a</sup> by gender<sup>b</sup>

|                                     | Men   |        |         | Women |        |         |
|-------------------------------------|-------|--------|---------|-------|--------|---------|
|                                     | Beta  | SE     | p-value | Beta  | SE     | p-value |
| <b>Gay/bisexual</b>                 | 0.00  | 0.01   | 0.58    | 0.00  | 0.01   | 0.58    |
| <b>Age (years)</b>                  | 0.00  | 0.00   | 0.01    | 0.00  | 0.00   | 0.92    |
| <b>Race</b>                         |       |        |         |       |        |         |
| Black                               | 0.07  | 0.01   | <0.0001 | 0.06  | 0.01   | <0.0001 |
| Asian                               | 0.03  | 0.01   | <0.0001 | 0.03  | 0.01   | <0.0001 |
| Hispanic                            | 0.02  | 0.01   | <0.0001 | 0.02  | 0.00   | <0.0001 |
| Multiracial, Native American, other | 0.02  | 0.01   | 0.01    | 0.02  | 0.01   | 0.03    |
| White                               | ref   |        |         | ref   |        |         |
| <b>Education</b>                    |       |        |         |       |        |         |
| <High school                        | 0.01  | 0.01   | 0.35    | 0.02  | 0.01   | 0.04    |
| High school degree                  | 0.01  | 0.01   | 0.29    | 0.00  | 0.01   | 0.52    |
| Some college/technical degree       | 0.00  | 0.01   | 0.49    | 0.00  | 0.00   | 0.79    |
| Bachelor's degree                   | 0.00  | 0.01   | 0.85    | 0.00  | 0.01   | 0.59    |
| Graduate degree                     | ref   |        |         | ref   |        |         |
| <b>Household income (\$)</b>        |       |        |         |       |        |         |
| Missing                             | 0.01  | 0.01   | 0.10    | 0.01  | 0.01   | 0.41    |
| 0–24,999                            | 0.01  | 0.01   | 0.11    | 0.01  | 0.01   | 0.20    |
| 25,000–39,999                       | 0.00  | 0.01   | 0.73    | 0.00  | 0.00   | 0.89    |
| 40,000–74,999                       | 0.01  | 0.01   | 0.27    | 0.00  | 0.00   | 0.60    |
| 75,000–99,999                       | 0.00  | 0.01   | 0.67    | 0.00  | 0.00   | 0.96    |
| ≥100,000                            | ref   |        |         | ref   |        |         |
| <b>Smoking status (%)</b>           |       |        |         |       |        |         |
| Current                             | 0.01  | 0.00   | 0.16    | 0.00  | 0.00   | 0.91    |
| Past/intermittent                   | 0.00  | 0.00   | 0.27    | 0.00  | 0.00   | 0.19    |
| Never                               | ref   |        |         | ref   |        |         |
| <b>Alcohol consumption</b>          |       |        |         |       |        |         |
| Moderate drinker                    | -0.01 | 0.00   | 0.09    | -0.01 | 0.00   | 0.02    |
| Heavy drinker                       | -0.03 | 0.01   | 0.002   | -0.02 | 0.01   | 0.01    |
| Abstainer                           | ref   |        |         | ref   |        |         |
| <b>Regular physical activity</b>    | -0.01 | 0.00   | 0.01    | -0.01 | 0.00   | 0.03    |
| <b>BMI</b>                          | 0.003 | 0.0003 | <0.0001 | 0.003 | 0.0003 | <0.0001 |
| <b>Antidiabetic medication</b>      | 0.45  | 0.06   | <0.0001 | 0.26  | 0.04   | <0.0001 |
| <b>R<sup>2</sup></b>                |       |        | 0.28    |       |        | 0.27    |

<sup>a</sup>The sensitivity of the conventional Roche HbA1c assay was 3%; the within- and between-run coefficients of variation were 2.2%–2.4%. Information obtained from Whitsel et al.<sup>1</sup>

<sup>b</sup>Linear regression analyses were conducted separately by gender. Gay/bisexual and lesbian/bisexual categories were compared to heterosexuals (i.e., the reference category). All models take into account the complex sample design, and sample weights.

### References for Appendix B

1. Whitsel EA, Tabor JW, Nguyen QC, et al. Measures of glucose homeostasis. Add Health Wave IV Documentation. Chapel Hill NC: Carolina Population Center, 2012.

## Appendix C

### Results of linear regression analyses for C-reactive protein by gender<sup>a</sup>: stratified by individuals with a self-reported illness in past 2 weeks

|                                                                                             | Men,<br>gay/bisexual |                 | Women,<br>lesbian/bisexual |                 |
|---------------------------------------------------------------------------------------------|----------------------|-----------------|----------------------------|-----------------|
|                                                                                             | $\beta$ (SE)         | <i>p</i> -value | $\beta$ (SE)               | <i>p</i> -value |
| <b>Sample with self-reported illness in past 2 weeks (<i>n</i>=3024, 30.5%)<sup>b</sup></b> |                      |                 |                            |                 |
| Model 1 <sup>c</sup>                                                                        | 0.10 (0.14)          | 0.51            | 0.10 (0.14)                | 0.45            |
| Model 2 <sup>d</sup>                                                                        | 0.13 (0.14)          | 0.35            | 0.17 (0.17)                | 0.31            |
| Model 3 <sup>e</sup>                                                                        | 0.20 (0.14)          | 0.17            | 0.05 (0.13)                | 0.71            |
| <b>Sample without self-reported illness in past 2 weeks (<i>n</i>=6876, 69.5%)</b>          |                      |                 |                            |                 |
| Model 1 <sup>c</sup>                                                                        | 0.18 (0.17)          | 0.29            | -0.25 (0.11)               | 0.02            |
| Model 2 <sup>d</sup>                                                                        | 0.17 (0.12)          | 0.16            | -0.25 (0.11)               | 0.02            |
| Model 3 <sup>e</sup>                                                                        | 0.22 (0.11)          | 0.055           | -0.28 (0.11)               | 0.01            |

Note: Individuals with CRP>10 (indicative of active infection) were excluded, as described in the Methods section of the main text.

<sup>a</sup> Linear regression analyses were conducted separately by gender. Gay/bisexual and lesbian/bisexual categories were compared to heterosexuals (i.e., the reference category). All models take into account the complex sample design, and sample weights; Illnesses in the past 2 weeks reflects self-reported cold or flu symptoms, fever, nausea, vomiting, diarrhea, night sweats, blood in stool or urine, frequent urination, or skin rash in the past 2 weeks.

<sup>b</sup> Approximately 30% of the sample self-reported having an illness in the past 2 weeks, which appears somewhat high relative to general population estimates for these illnesses. Although this does not bias the current results (i.e., the estimates are similar in trend between the previously ill and healthy individuals), future studies are needed to address the reliability and validity of these self-reported illnesses.

<sup>c</sup> Model 1 is adjusted for age.

<sup>d</sup> Model 2 is adjusted for age, race/ethnicity (ref=white); education (<high school, high school degree, some college/technical degree, bachelor's degree, graduate degree; ref=graduate degree); income (\$0-\$24,999, \$25,000-\$39,999, \$40,000-\$74,999, \$75,000-\$99,999, >\$100,000; ref= >\$100,000).

<sup>e</sup> Model 3 is adjusted for covariates in Model 2 plus smoking (never, previous/intermittent, regular smoker; ref=never); regular physical activity (dichotomous; ref=regular exercise); alcohol consumption (daily or almost every day); BMI; cardiac medication use (ref=no cardiac medication); and aspirin or other anti-inflammatory medications in the past 24 hours (ref=no aspirin or other anti-inflammatory medication use in past 24 hours).

## Appendix D

Results of linear regression analyses for systolic and diastolic blood pressure, pulse rate, C-reactive protein, and hemoglobin A1c by gender<sup>a</sup>: models estimated using list-wise deletion to show that findings are consistent with complete case analyses

|                                         | Men<br>gay/bisexual  |                            | Women<br>lesbian/bisexual |                         |
|-----------------------------------------|----------------------|----------------------------|---------------------------|-------------------------|
|                                         | $\beta$ (SE)         | Adjusted<br>R <sup>2</sup> | $\beta$ (SE)              | Adjusted R <sup>2</sup> |
| <b>Systolic blood pressure (mm/Hg)</b>  |                      |                            |                           |                         |
| Model 1 <sup>b</sup>                    | 1.11 (1.26)          | 0.001                      | <b>2.14 (0.91)*</b>       | 0.004                   |
| Model 2 <sup>c</sup>                    | 1.30 (1.29)          | 0.005                      | 1.69 (0.88)~              | 0.03                    |
| <b>Diastolic blood pressure (mm/Hg)</b> |                      |                            |                           |                         |
| Model 1 <sup>b</sup>                    | 2.30 (1.17)          | 0.01                       | 0.95 (0.74)               | 0.01                    |
| Model 2 <sup>c</sup>                    | <b>2.53 (1.18)*</b>  | 0.02                       | 0.58 (0.72)               | 0.03                    |
| <b>Pulse rate (BPM)</b>                 |                      |                            |                           |                         |
| Model 1 <sup>b</sup>                    | <b>3.20 (1.51)*</b>  | 0.004                      | -0.08 (0.99)              | 0.00                    |
| Model 2 <sup>c</sup>                    | <b>3.73 (1.55)*</b>  | 0.03                       | -0.62 (0.97)              | 0.02                    |
| <b>Log C-reactive protein (mg/L)</b>    |                      |                            |                           |                         |
| Model 1 <sup>b</sup>                    | 0.10 (0.11)          | 0.004                      | -0.10 (0.09)              | 0.00                    |
| Model 2 <sup>c</sup>                    | 0.15 (0.10)          | 0.03                       | -0.13 (0.09)              | 0.02                    |
| <b>Log hemoglobin A1c (%)</b>           |                      |                            |                           |                         |
| Model 1 <sup>b</sup>                    | <b>-0.01 (0.01)*</b> | 0.01                       | 0.01 (0.01)               | 0.001                   |
| Model 2 <sup>c</sup>                    | -0.01 (0.01)         | 0.07                       | 0.01 (0.01)               | 0.09                    |

Note: Boldface indicates significance.

<sup>a</sup> Linear regression analyses were conducted separately by gender. Gay/bisexual and lesbian/bisexual categories were compared to heterosexuals (i.e., the reference category). All models take into account the complex sample design, and sample weights;

<sup>b</sup>Model 1 is adjusted for age.

<sup>c</sup>Model 2 is adjusted for age; race/ethnicity (ref=white); education (<high school, high school degree, some college/technical degree, bachelor's degree, graduate degree; ref=graduate degree); income (\$0-\$24,999, \$25,000-\$39,999, \$40,000-\$74,999, \$75,000-\$99,999,  $\geq$ \$100,000; ref= $\geq$ \$100,000).

\* $p < 0.05$

BPM, beats per minute

## Appendix E

### Results of linear regression analyses for systolic blood pressure by gender<sup>a</sup>

|                                     | Men   |      |         | Women |      |         |
|-------------------------------------|-------|------|---------|-------|------|---------|
|                                     | Beta  | SE   | p-value | Beta  | SE   | p-value |
| <b>Gay/bisexual</b>                 | 1.86  | 1.19 | 0.12    | 0.78  | 0.95 | 0.41    |
| <b>Age (years)</b>                  | 0.15  | 0.14 | 0.29    | 0.28  | 0.12 | 0.02    |
| <b>Race</b>                         |       |      |         |       |      |         |
| Black                               | -0.16 | 0.63 | 0.80    | 1.32  | 0.59 | 0.03    |
| Asian                               | 0.03  | 1.35 | 0.98    | -0.53 | 1.24 | 0.67    |
| Hispanic                            | -1.22 | 0.76 | 0.11    | -0.75 | 0.72 | 0.30    |
| Multiracial, Native American, other | -0.19 | 0.97 | 0.85    | -1.17 | 0.86 | 0.18    |
| White                               | ref   |      |         | ref   |      |         |
| <b>Education</b>                    |       |      |         |       |      |         |
| <High school                        | 1.17  | 1.12 | 0.30    | -1.30 | 1.12 | 0.25    |
| High school degree                  | 0.81  | 1.05 | 0.44    | -0.60 | 0.89 | 0.50    |
| Some college/technical degree       | -0.11 | 0.87 | 0.90    | -0.67 | 0.72 | 0.36    |
| Bachelor's degree                   | 0.96  | 0.84 | 0.25    | -0.58 | 0.57 | 0.31    |
| Graduate degree                     | ref   |      |         | ref   |      |         |
| <b>Household income (\$)</b>        |       |      |         |       |      |         |
| Missing                             | 1.36  | 0.97 | 0.16    | 0.78  | 0.94 | 0.41    |
| 0-24,999                            | 1.52  | 0.79 | 0.06    | 1.16  | 0.87 | 0.19    |
| 25,000-39,999                       | 1.53  | 0.75 | 0.04    | 1.44  | 0.82 | 0.08    |
| 40,000-74,999                       | 1.35  | 0.65 | 0.04    | 1.73  | 0.67 | 0.01    |
| 75,000-99,999                       | 0.93  | 0.72 | 0.20    | 0.99  | 0.84 | 0.24    |
| ≥100,000                            | ref   |      |         | ref   |      |         |
| <b>Smoking status (%)</b>           |       |      |         |       |      |         |
| Current                             | 0.96  | 0.55 | 0.08    | 1.92  | 0.66 | 0.00    |
| Past/intermittent                   | 0.75  | 0.53 | 0.16    | -0.24 | 0.48 | 0.62    |
| Never                               | ref   |      |         | ref   |      |         |
| <b>Alcohol consumption</b>          |       |      |         |       |      |         |
| Moderate drinker                    | 1.16  | 0.44 | 0.01    | 1.02  | 0.51 | 0.05    |
| Heavy drinker                       | 4.46  | 1.42 | 0.002   | 6.35  | 1.92 | 0.001   |
| Abstainer                           | ref   |      |         | ref   |      |         |
| <b>Regular physical activity</b>    | 0.23  | 0.43 | 0.60    | -0.40 | 0.43 | 0.35    |
| <b>BMI</b>                          | 0.54  | 0.04 | <0.0001 | 0.59  | 0.03 | <0.0001 |
| <b>Cardiac medication</b>           | 3.19  | 1.24 | 0.01    | 5.15  | 1.52 | 0.001   |
| <b>R<sup>2</sup></b>                |       |      | 0.09    |       |      | 0.16    |

<sup>a</sup>Linear regression analyses were conducted separately by gender. Gay/bisexual and lesbian/bisexual categories were compared to heterosexuals (i.e., the reference category). All models take into account the complex sample design, and sample weights.

## Appendix F

### Results of linear regression analyses for diastolic blood pressure by gender<sup>a</sup>

|                                     | Men   |      |         | Women |      |         |
|-------------------------------------|-------|------|---------|-------|------|---------|
|                                     | Beta  | SE   | p-value | Beta  | SE   | p-value |
| <b>Gay/bisexual</b>                 | 2.99  | 1.20 | 0.01    | -0.08 | 0.81 | 0.93    |
| <b>Age (years)</b>                  | 0.53  | 0.09 | <0.0001 | 0.50  | 0.10 | <0.0001 |
| <b>Race</b>                         |       |      |         |       |      |         |
| Black                               | -0.62 | 0.49 | 0.21    | 0.98  | 0.41 | 0.02    |
| Asian                               | 0.86  | 0.96 | 0.37    | 0.83  | 0.87 | 0.34    |
| Hispanic                            | -1.02 | 0.54 | 0.06    | -0.80 | 0.62 | 0.20    |
| Multiracial, Native American, other | 0.02  | 0.83 | 0.98    | -0.06 | 0.67 | 0.93    |
| White                               | ref   |      |         | ref   |      |         |
| <b>Education</b>                    |       |      |         |       |      |         |
| <High school                        | 2.01  | 0.77 | 0.01    | -0.44 | 0.96 | 0.65    |
| High school degree                  | 1.34  | 0.70 | 0.06    | -0.32 | 0.74 | 0.67    |
| Some college/technical degree       | 0.86  | 0.61 | 0.16    | -0.18 | 0.57 | 0.76    |
| Bachelor's degree                   | 1.25  | 0.64 | 0.05    | -0.22 | 0.54 | 0.69    |
| Graduate degree                     | ref   |      |         | ref   |      |         |
| <b>Household income (\$)</b>        |       |      |         |       |      |         |
| Missing                             | 0.56  | 0.77 | 0.47    | 1.60  | 0.73 | 0.03    |
| 0-24,999                            | 0.79  | 0.56 | 0.16    | 1.57  | 0.61 | 0.01    |
| 25,000-39,999                       | 1.01  | 0.54 | 0.06    | 1.30  | 0.61 | 0.03    |
| 40,000-74,999                       | 0.90  | 0.48 | 0.06    | 1.31  | 0.48 | 0.01    |
| 75,000-99,999                       | 0.66  | 0.53 | 0.22    | 1.02  | 0.68 | 0.14    |
| ≥100,000                            | ref   |      |         | ref   |      |         |
| <b>Smoking status (%)</b>           |       |      |         |       |      |         |
| Current                             | 0.93  | 0.42 | 0.03    | 0.71  | 0.51 | 0.17    |
| Past/intermittent                   | 0.60  | 0.39 | 0.13    | -0.06 | 0.44 | 0.89    |
| Never                               | ref   |      |         | ref   |      |         |
| <b>Alcohol consumption</b>          |       |      |         |       |      |         |
| Moderate drinker                    | 0.81  | 0.37 | 0.03    | 0.85  | 0.34 | 0.01    |
| Heavy drinker                       | 3.44  | 0.95 | 0.0004  | 4.69  | 1.53 | 0.003   |
| Abstainer                           | ref   |      |         | ref   |      |         |
| <b>Regular physical activity</b>    | -0.90 | 0.32 | 0.01    | -0.77 | 0.37 | 0.04    |
| <b>BMI</b>                          | 0.36  | 0.03 | <0.0001 | 0.33  | 0.02 | <0.0001 |
| <b>Cardiac medication</b>           | 2.63  | 0.92 | 0.01    | 4.09  | 1.29 | 0.002   |
| <b>R<sup>2</sup></b>                |       |      | 0.09    |       |      | 0.11    |

<sup>a</sup>Linear regression analyses were conducted separately by gender. Gay/bisexual and lesbian/bisexual categories were compared to heterosexuals (i.e., the reference category). All models take into account the complex sample design, and sample weights.

## Appendix G

### Results of linear regression analyses for pulse rate by gender<sup>a</sup>

|                                     | Men   |      |         | Women |      |         |
|-------------------------------------|-------|------|---------|-------|------|---------|
|                                     | Beta  | SE   | p-value | Beta  | SE   | p-value |
| <b>Gay/bisexual</b>                 | 4.16  | 1.56 | 0.01    | -0.14 | 0.95 | 0.88    |
| <b>Age</b>                          | 0.22  | 0.12 | 0.08    | 0.03  | 0.11 | 0.81    |
| <b>Race</b>                         |       |      |         |       |      |         |
| Black                               | -1.15 | 0.66 | 0.08    | -0.07 | 0.62 | 0.91    |
| Asian                               | -0.60 | 1.17 | 0.61    | -2.75 | 1.08 | 0.01    |
| Hispanic                            | -0.91 | 0.77 | 0.24    | -1.18 | 0.80 | 0.14    |
| Multiracial, Native American, other | -0.71 | 0.89 | 0.43    | 2.04  | 0.78 | 0.01    |
| White                               | ref   |      |         | ref   |      |         |
| <b>Education</b>                    |       |      |         |       |      |         |
| <High school                        | 2.41  | 1.20 | 0.05    | 1.03  | 1.01 | 0.31    |
| High school degree                  | 1.79  | 0.95 | 0.06    | 0.74  | 0.79 | 0.35    |
| Some college/technical degree       | 1.47  | 0.88 | 0.10    | 0.39  | 0.62 | 0.53    |
| Bachelor's degree                   | 0.37  | 0.99 | 0.71    | -0.38 | 0.66 | 0.57    |
| Graduate degree                     | ref   |      |         | ref   |      |         |
| <b>Household income (\$)</b>        |       |      |         |       |      |         |
| Missing                             | 1.48  | 0.95 | 0.12    | 0.79  | 1.00 | 0.43    |
| 0-24,999                            | 1.30  | 0.81 | 0.11    | 0.97  | 0.84 | 0.25    |
| 25,000-39,999                       | 0.77  | 0.79 | 0.34    | 0.39  | 0.75 | 0.61    |
| 40,000-74,999                       | -0.06 | 0.61 | 0.92    | 0.90  | 0.59 | 0.13    |
| 75,000-99,999                       | -0.54 | 0.68 | 0.43    | 0.56  | 0.67 | 0.40    |
| ≥100,000                            | ref   |      |         | ref   |      |         |
| <b>Smoking status (%)</b>           |       |      |         |       |      |         |
| Current                             | 3.67  | 0.56 | <0.0001 | 1.22  | 0.54 | 0.03    |
| Past/intermittent                   | 0.83  | 0.43 | 0.06    | -0.64 | 0.53 | 0.23    |
| Never                               | ref   |      |         | ref   |      |         |
| <b>Alcohol consumption</b>          |       |      |         |       |      |         |
| Moderate drinker                    | -0.63 | 0.53 | 0.23    | -0.92 | 0.47 | 0.05    |
| Heavy drinker                       | 1.56  | 1.31 | 0.24    | -2.66 | 1.76 | 0.13    |
| Abstainer                           | ref   |      |         | ref   |      |         |
| <b>Regular physical activity</b>    | -2.75 | 0.41 | <0.0001 | -1.68 | 0.34 | <0.0001 |
| <b>BMI</b>                          | 0.43  | 0.03 | <0.0001 | 0.26  | 0.02 | <0.0001 |
| <b>Cardiac medication</b>           | 1.77  | 1.31 | 0.18    | 0.24  | 1.10 | 0.83    |
| <b>R<sup>2</sup></b>                |       |      | 0.11    |       |      | 0.07    |

<sup>a</sup>Linear regression analyses were conducted separately by gender. Gay/bisexual and lesbian/bisexual categories were compared to heterosexuals (i.e., the reference category). All models take into account the complex sample design, and sample weights.
